# Supplementary material for: Unhealthy Food Choices among Healthcare Shift Workers: A Cross-Sectional Study
Source: MDPI journal article supplement (doi:10.3390/nu14204327), 2022-10-16
Supplement: s1 [file s1]

**Table S1.** Description of 23 food groups aggregated: data based on the FFQ-6 questionnaire [Niedzwiedzka et al. 2019].

| No | Food groups                                           | Food groups description (food items)                                                                                                                                                                                                                                                                                                                                                                            |
|----|-------------------------------------------------------|-----------------------------------------------------------------------------------------------------------------------------------------------------------------------------------------------------------------------------------------------------------------------------------------------------------------------------------------------------------------------------------------------------------------|
| 1  | Sugar, honey and sweets                               | Sugar added to beverages, such as tea, coffee, etc.;<br>Honey added to dishes and added to beverages;<br>Chocolates, chocolate sweets and chocolate bars, sugar confectionery (boiled sweets, hard caramels, jellied sweets, fudge, etc.), baked confectionery (biscuits, cream cakes, fruit cakes, sponge cakes, cheesecakes, doughnuts, poppy-seed cakes, muffins, croissants, etc.), ice-creams and custard. |
| 2  | Milk and milk beverages – natural and cheese curds    | Milk and natural milk beverages (yoghurt, kefir, buttermilk), porridge, etc.<br>Cheese curd, natural cottage cheese, soft cheese, mozzarella, cottage cheese with herbs, etc.                                                                                                                                                                                                                                   |
| 3  | Milk beverages – sweetened and flavoured cheese curds | Fruit yoghurts, yoghurts with chocolate flakes, flavoured buttermilk, hot chocolate, etc.<br>Flavoured curds (with fruit, chocolate, vanilla), etc.                                                                                                                                                                                                                                                             |
| 4  | Cheese                                                | Hard cheese, blue cheese, processed cheese, cheese spreads, etc.                                                                                                                                                                                                                                                                                                                                                |
| 5  | Eggs and egg dishes                                   | Scrambled eggs, omelette, egg salad, cooked eggs.                                                                                                                                                                                                                                                                                                                                                               |
| 6  | Whole grains                                          | Wholemeal wheat or rye bread, seeded loafs, pumpernickel, wholemeal cracker bread, etc.<br>Buckwheat groats, barley, brown rice, wholemeal pasta, etc.                                                                                                                                                                                                                                                          |
| 7  | Refined grains                                        | Semolina, milled barley, pasta, white rice, rice flakes, etc.                                                                                                                                                                                                                                                                                                                                                   |
| 8  | Breakfast cereals                                     | Prepared breakfast cereals, unboiled milk additives, e.g. muesli, cornflakes with or without additives                                                                                                                                                                                                                                                                                                          |
| 9  | Vegetable based oil                                   | Vegetable oils;<br>Olive oil.                                                                                                                                                                                                                                                                                                                                                                                   |
| 10 | Animal fats                                           | Butter;<br>Lard, pork fat, etc.<br>Cream (single, double, sour, used as an ingredient or added to beverages).                                                                                                                                                                                                                                                                                                   |
| 11 | Other fats                                            | all kinds of margarine in cubes (for frying, baking), margarine in cups (for spreading)<br>mayonnaise, salad dressings                                                                                                                                                                                                                                                                                          |
| 12 | Fruits                                                | All kinds of fruits.                                                                                                                                                                                                                                                                                                                                                                                            |
| 13 | Vegetables                                            | All kinds of vegetables (potatoes not included).                                                                                                                                                                                                                                                                                                                                                                |
| 14 | Legumes                                               | Fresh and tinned legumes (corn, green peas, green beans, etc.);<br>Dry and processed pulses (beans (fava, butter kidney, broad, French, green), soya, peas, chickpea and processed pulses (baked beans, hummus, other bread spreads)).                                                                                                                                                                          |
| 15 | Potatoes                                              | Boiled, baked, French fries, potato rosti, gnocchi, etc.                                                                                                                                                                                                                                                                                                                                                        |
| 16 | Nuts and seeds                                        | Peanuts, hazelnuts, walnuts, cashews, coconuts, chestnuts, peanut butter, chocolate-nut spread, etc.<br>Pumpkin seeds, sesame seeds, sunflower seeds, wheat germs, wheat bran, etc.                                                                                                                                                                                                                             |
| 17 | Processed meats                                       | Sausages, bacon, reconstituted meat (sausages, meat loaf, hot-dogs, smoked sausages, bacon, etc.)<br>High quality cured meats (ham, poultry and pork-beef good quality cold meats, etc.)<br>Offal products (liver, blood sausage, sweetbread, liver pate, etc.).                                                                                                                                                |
| 18 | White meat                                            | Poultry and rabbit.                                                                                                                                                                                                                                                                                                                                                                                             |
| 19 | Fish                                                  | Lean fish (pollock, cod, perch, hake, carp to 1 kg, tuna, panga, trout, etc.)<br>Oily fish (salmon, sardines, herring, mackerel, eel, large carp, etc.).                                                                                                                                                                                                                                                        |
| 20 | Fruit, vegetable or vegetable-fruit juices            | Fruit juices and nectars (mixed fruit juice, orange, grapefruit, apple, pear, grape, blackcurrant, cherry juice)<br>Vegetable and vegetable-fruit juices (mixed vegetable juice, tomato, carrot and carrot-fruit juice).                                                                                                                                                                                        |
| 21 | Sweetened beverages                                   | All kinds of sweetened beverages.                                                                                                                                                                                                                                                                                                                                                                               |
| 22 | Alcoholic drinks                                      | All kinds of alcohol, including beer, wine, drinks, vodka, and spirits                                                                                                                                                                                                                                                                                                                                          |
| 23 | Salty snacks                                          | Chipsy, crackers, salted sticks, salted peanuts, etc.                                                                                                                                                                                                                                                                                                                                                           |

**Table S2.** Description of food groups for the Polish-adapted Mediterranean Diet® score (0-8 points) calculation – data for the Initial control sample (n=412) [Krusinska et al. 2018].

| Food groups/food items                                                                                                                                                                                                                                                                                                                                                                                                                                                                                         | Frequency of consumption (times/day)* |        | Criteria for 1 point                    |
|----------------------------------------------------------------------------------------------------------------------------------------------------------------------------------------------------------------------------------------------------------------------------------------------------------------------------------------------------------------------------------------------------------------------------------------------------------------------------------------------------------------|---------------------------------------|--------|-----------------------------------------|
|                                                                                                                                                                                                                                                                                                                                                                                                                                                                                                                | Mean (95% CI)                         | Median |                                         |
| <b>VEGETABLES:</b> all kinds of vegetables:<br>cruciferous vegetables (cabbages, brussel sprouts, cauliflower, broccoli, kale, etc.), yellow-orange vegetables (carrots, peppers, etc.), leafy green vegetables (spinach, chicory, lettuce, rocket, leek, celery, parsley, etc.), tomatoes, gourds and squashes (fresh cucumber, marrow, courgettes, pumpkins, aubergines, etc.), root vegetables and other (parsnip, beetroots, onion, garlic, celeriac, radishes, turnip, salads and mixed vegetables, etc.) | 1.064 (1.010; 1.117)                  | 1.000  | Greater than median intake (times/day)* |
| <b>FRUIT:</b> all kinds of fruit:<br>stone fruit (apricots, cherries, nectarines, peaches, plums, grapes, etc.), kiwi and citrus fruit (kiwi, oranges, mandarins, grapefruit, lemons, pomelos, etc.), tropical fruits (pineapples, watermelon, melons, fresh dates and figs, etc.), berries (strawberries, raspberries, blackberries, blueberries, redcurrants, blackcurrants, etc.), bananas, apples, pears, avocado                                                                                          | 0.917 (0.867; 0.967)                  | 1.000  | Greater than median intake (times/day)* |
| <b>WHOLE GRAINS:</b> wholemeal wheat or rye bread, seeded loafs, pumpernickel, wholemeal groats, wholemeal rice, wholemeal pasta                                                                                                                                                                                                                                                                                                                                                                               | 0.767 (0.703; 0.832)                  | 0.671  | Greater than median intake (times/day)* |
| <b>FISH:</b> lean fish (ollock, cod, perch, hake, carp to 1 kg, tuna, panga, trout, etc.)<br>oily fish (salmon, sardines, herring, mackerel, eel, large carp, etc.)                                                                                                                                                                                                                                                                                                                                            | 0.268 (0.238; 0.297)                  | 0.200  | Greater than median intake (times/day)* |
| <b>LEGUMES:</b> fresh and tinned legumes (corn, green peas, green beans, etc.),<br>dry and processed pulses beans (fava, broad, French, green), soya, peas, chickpea and processed pulses (baked beans, hummus, other bread spreads)                                                                                                                                                                                                                                                                           | 0.208 (0.181; 0.235)                  | 0.125  | Greater than median intake (times/day)* |
| <b>NUTS and SEEDS:</b> peanuts, hazelnuts, walnuts, almonds, pistachios, cashews, coconuts, chestnuts, etc., pumpkin seeds, sesame seeds, sunflower seeds, wheat germs, etc.                                                                                                                                                                                                                                                                                                                                   | 0.281 (0.239; 0.323)                  | 0.100  | Greater than median intake (times/day)* |
| <b>RATIO of VEGETABLES OILS</b> (rapeseed oil, sunflower oil, linseed oil, olives) <b>to ANIMAL FAT</b> (butter, cream, lard) instead of <b>RATIO of MONOUNSATURATED to SATURATED FAT</b>                                                                                                                                                                                                                                                                                                                      | 1.745 (1.231; 2.258)                  | 0.500  | Greater than median intake (times/day)* |
| <b>PROCESED MEAT:</b> sausages, bacon, reconstituted meat (sausages, meat loaf, hot-dogs, smoked sausages, bacon, etc.), high quality cured meats (ham, poultry and pork-beef good quality cold meats, etc.), offal products (liver, blood sausage, sweetbread, liver pate, etc.).                                                                                                                                                                                                                             | 1.151 (1.081; 1.221)                  | 1.167  | Lower than median intake (times/day)*   |

\*food frequency consumption was expressed as a times/day after assigning the values for categories of frequencies as follows: 'never or almost never'=0; 'once a month or less'=0.025; 'several times a month'=0.1; 'several times a week'=0.571; 'daily'=1; 'several times a day'=2; 95% CI – 95% confidence interval.

**Table S3.** The mean (95%CI) of the frequency of food consumption by dietary patterns among Polish health care workers (times/day).

| Food groups <sup>#</sup>                              | Dietary Patterns (tertiles/levels) |                   |                   |                        |                   |                   |                           |                   |                   |                   |                   |
|-------------------------------------------------------|------------------------------------|-------------------|-------------------|------------------------|-------------------|-------------------|---------------------------|-------------------|-------------------|-------------------|-------------------|
|                                                       | 'Sweet-salty-snack-dairy'          |                   |                   | 'Lacto-ovo-vegetarian' |                   |                   | 'Meat- fats-alcohol-fish' |                   |                   | Polish-aMED®      |                   |
|                                                       | bottom                             | middle            | upper             | bottom                 | middle            | upper             | bottom                    | middle            | upper             | lower             | higher            |
| Size (n)                                              | 148                                | 148               | 149               | 148                    | 149               | 148               | 149                       | 147               | 149               | 297               | 148               |
| Sugar, honey and sweets                               | 0.5<br>(0.4, 0.5)                  | 1.1<br>(0.9, 1.2) | 2.3<br>(2.0, 2.6) | 1.4<br>(1.2, 1.7)      | 1.3<br>(1.1, 1.5) | 1.0<br>(0.9, 1.2) | 0.9<br>(0.8, 1.1)         | 1.2<br>(1.0, 1.4) | 1.7<br>(1.4, 2.0) | 1.4<br>(1.2, 1.6) | 1.0<br>(0.9, 1.2) |
| Milk and milk beverages – natural and cheese curds    | 0.5<br>(0.4, 0.6)                  | 1.0<br>(0.9, 1.2) | 1.5<br>(1.3, 1.6) | 0.6<br>(0.5, 0.7)      | 1.0<br>(0.9, 1.1) | 1.4<br>(1.3, 1.6) | 1.2<br>(1.1, 1.4)         | 0.9<br>(0.8, 1.0) | 0.9<br>(0.8, 1.0) | 0.9<br>(0.8, 1.0) | 1.3<br>(1.1, 1.4) |
| Milk beverages – sweetened and flavoured cheese curds | 0.0<br>(0.0, 0.1)                  | 0.2<br>(0.1, 0.2) | 0.6<br>(0.5, 0.7) | 0.3<br>(0.2, 0.3)      | 0.3<br>(0.2, 0.3) | 0.3<br>(0.2, 0.4) | 0.3<br>(0.2, 0.4)         | 0.2<br>(0.2, 0.3) | 0.3<br>(0.3, 0.4) | 0.3<br>(0.2, 0.3) | 0.3<br>(0.2, 0.3) |
| Cheese                                                | 0.2<br>(0.1, 0.2)                  | 0.4<br>(0.3, 0.5) | 0.7<br>(0.6, 0.8) | 0.3<br>(0.2, 0.4)      | 0.4<br>(0.3, 0.5) | 0.6<br>(0.5, 0.6) | 0.4<br>(0.3, 0.5)         | 0.4<br>(0.3, 0.4) | 0.5<br>(0.4, 0.6) | 0.4<br>(0.4, 0.5) | 0.4<br>(0.4, 0.5) |
| Eggs and egg dishes                                   | 0.4<br>(0.3, 0.5)                  | 0.5<br>(0.4, 0.6) | 0.6<br>(0.5, 0.7) | 0.3<br>(0.3, 0.4)      | 0.5<br>(0.4, 0.5) | 0.7<br>(0.6, 0.8) | 0.4<br>(0.4, 0.5)         | 0.5<br>(0.4, 0.5) | 0.6<br>(0.5, 0.6) | 0.5<br>(0.4, 0.5) | 0.6<br>(0.5, 0.7) |
| Whole grains                                          | 0.8<br>(0.7, 0.9)                  | 1.0<br>(0.9, 1.1) | 0.9<br>(0.7, 1.0) | 0.4<br>(0.3, 0.4)      | 0.9<br>(0.8, 1.0) | 1.4<br>(1.3, 1.5) | 0.9<br>(0.8, 1.1)         | 0.9<br>(0.8, 1.0) | 0.9<br>(0.7, 1.0) | 0.6<br>(0.6, 0.7) | 1.4<br>(1.3, 1.5) |
| Refined grains                                        | 0.2<br>(0.2, 0.3)                  | 0.6<br>(0.5, 0.6) | 1.1<br>(0.9, 1.2) | 0.6<br>(0.5, 0.7)      | 0.7<br>(0.6, 0.7) | 0.6<br>(0.5, 0.7) | 0.5<br>(0.4, 0.6)         | 0.6<br>(0.5, 0.6) | 0.8<br>(0.7, 0.9) | 0.6<br>(0.5, 0.7) | 0.6<br>(0.5, 0.7) |
| Breakfast cereals                                     | 0.0<br>(0.0, 0.0)                  | 0.1<br>(0.1, 0.1) | 0.4<br>(0.3, 0.4) | 0.1<br>(0.1, 0.2)      | 0.2<br>(0.1, 0.2) | 0.1<br>(0.1, 0.2) | 0.2<br>(0.1, 0.3)         | 0.1<br>(0.1, 0.2) | 0.2<br>(0.1, 0.2) | 0.1<br>(0.1, 0.2) | 0.2<br>(0.1, 0.2) |
| Vegetable based oil                                   | 0.4<br>(0.3, 0.4)                  | 0.4<br>(0.4, 0.5) | 0.5<br>(0.5, 0.6) | 0.3<br>(0.2, 0.3)      | 0.4<br>(0.3, 0.5) | 0.6<br>(0.6, 0.7) | 0.3<br>(0.3, 0.4)         | 0.4<br>(0.3, 0.5) | 0.6<br>(0.5, 0.7) | 0.4<br>(0.3, 0.4) | 0.6<br>(0.5, 0.7) |
| Animal fats                                           | 0.5<br>(0.4, 0.6)                  | 0.6<br>(0.5, 0.7) | 1.0<br>(0.9, 1.1) | 0.7<br>(0.6, 0.8)      | 0.7<br>(0.6, 0.8) | 0.8<br>(0.7, 1.0) | 0.4<br>(0.3, 0.4)         | 0.7<br>(0.6, 0.8) | 1.1<br>(1.0, 1.3) | 0.8<br>(0.7, 0.9) | 0.6<br>(0.5, 0.7) |
| Other fats                                            | 0.2<br>(0.1, 0.3)                  | 0.2<br>(0.1, 0.3) | 0.4<br>(0.4, 0.5) | 0.4<br>(0.3, 0.4)      | 0.2<br>(0.2, 0.3) | 0.3<br>(0.2, 0.3) | 0.1<br>(0.1, 0.1)         | 0.2<br>(0.2, 0.3) | 0.5<br>(0.4, 0.6) | 0.3<br>(0.3, 0.4) | 0.2<br>(0.1, 0.2) |
| Fruits                                                | 0.6<br>(0.6, 0.7)                  | 0.8<br>(0.8, 0.9) | 0.8<br>(0.7, 0.9) | 0.4<br>(0.3, 0.4)      | 0.8<br>(0.7, 0.8) | 1.1<br>(1.0, 1.2) | 0.8<br>(0.7, 0.9)         | 0.8<br>(0.7, 0.9) | 0.7<br>(0.6, 0.8) | 0.6<br>(0.6, 0.7) | 1.0<br>(0.9, 1.1) |
| Vegetables                                            | 0.9<br>(0.8, 1.0)                  | 1.0<br>(0.9, 1.1) | 0.9<br>(0.8, 1.1) | 0.4<br>(0.3, 0.5)      | 0.9<br>(0.8, 1.0) | 1.5<br>(1.4, 1.6) | 0.9<br>(0.8, 1.0)         | 0.9<br>(0.8, 1.0) | 0.9<br>(0.8, 1.0) | 0.7<br>(0.6, 0.7) | 1.4<br>(1.3, 1.5) |
| Legumes                                               | 0.6<br>(0.5, 0.8)                  | 0.5<br>(0.4, 0.6) | 0.4<br>(0.4, 0.5) | 0.2<br>(0.1, 0.2)      | 0.4<br>(0.3, 0.5) | 1.0<br>(0.9, 1.1) | 0.5<br>(0.4, 0.6)         | 0.6<br>(0.4, 0.7) | 0.6<br>(0.4, 0.7) | 0.3<br>(0.3, 0.4) | 0.9<br>(0.8, 1.0) |
| Potatoes                                              | 0.2<br>(0.2, 0.3)                  | 0.4<br>(0.3, 0.4) | 0.5<br>(0.4, 0.6) | 0.3<br>(0.2, 0.4)      | 0.4<br>(0.3, 0.5) | 0.4<br>(0.4, 0.5) | 0.3<br>(0.2, 0.3)         | 0.3<br>(0.3, 0.4) | 0.5<br>(0.5, 0.6) | 0.4<br>(0.3, 0.4) | 0.4<br>(0.3, 0.5) |
| Nuts and seeds                                        | 0.9<br>(0.7, 1.0)                  | 0.6<br>(0.5, 0.7) | 0.7<br>(0.6, 0.8) | 0.3<br>(0.2, 0.4)      | 0.6<br>(0.5, 0.6) | 1.3<br>(1.1, 1.5) | 0.6<br>(0.5, 0.7)         | 0.7<br>(0.5, 0.8) | 0.9<br>(0.7, 1.0) | 0.5<br>(0.5, 0.6) | 1.1<br>(0.9, 1.3) |
| Processed meats                                       | 0.5<br>(0.3, 0.6)                  | 0.5<br>(0.4, 0.6) | 0.8<br>(0.7, 1.0) | 0.7<br>(0.6, 0.9)      | 0.6<br>(0.5, 0.7) | 0.4<br>(0.3, 0.5) | 0.2<br>(0.1, 0.2)         | 0.4<br>(0.4, 0.5) | 1.2<br>(1.1, 1.3) | 0.7<br>(0.6, 0.8) | 0.4<br>(0.3, 0.5) |
| White meat                                            | 0.3<br>(0.2, 0.3)                  | 0.3<br>(0.2, 0.4) | 0.4<br>(0.3, 0.5) | 0.3<br>(0.2, 0.3)      | 0.3<br>(0.3, 0.4) | 0.3<br>(0.3, 0.4) | 0.1<br>(0.1, 0.2)         | 0.3<br>(0.2, 0.3) | 0.6<br>(0.5, 0.7) | 0.3<br>(0.3, 0.4) | 0.3<br>(0.3, 0.4) |

|                                            |                   |                   |                   |                   |                   |                   |                   |                   |                   |                   |                   |
|--------------------------------------------|-------------------|-------------------|-------------------|-------------------|-------------------|-------------------|-------------------|-------------------|-------------------|-------------------|-------------------|
| Fish                                       | 0.4<br>(0.3, 0.5) | 0.3<br>(0.2, 0.4) | 0.3<br>(0.2, 0.4) | 0.2<br>(0.2, 0.3) | 0.3<br>(0.2, 0.4) | 0.5<br>(0.4, 0.6) | 0.2<br>(0.1, 0.2) | 0.2<br>(0.2, 0.3) | 0.7<br>(0.5, 0.8) | 0.3<br>(0.2, 0.3) | 0.5<br>(0.4, 0.6) |
| Fruit, vegetable or vegetable-fruit juices | 0.2<br>(0.1, 0.2) | 0.3<br>(0.2, 0.4) | 0.4<br>(0.3, 0.5) | 0.3<br>(0.2, 0.4) | 0.4<br>(0.3, 0.4) | 0.2<br>(0.2, 0.3) | 0.1<br>(0.1, 0.2) | 0.3<br>(0.2, 0.4) | 0.5<br>(0.4, 0.6) | 0.3<br>(0.3, 0.4) | 0.3<br>(0.2, 0.3) |
| Sweetened beverages                        | 0.0<br>(0.0, 0.0) | 0.1<br>(0.0, 0.1) | 0.2<br>(0.2, 0.3) | 0.2<br>(0.1, 0.3) | 0.1<br>(0.1, 0.1) | 0.0<br>(0.0, 0.0) | 0.0<br>(0.0, 0.1) | 0.1<br>(0.0, 0.1) | 0.2<br>(0.1, 0.3) | 0.1<br>(0.1, 0.2) | 0.1<br>(0.0, 0.1) |
| Alcoholic drinks                           | 0.2<br>(0.1, 0.3) | 0.2<br>(0.2, 0.2) | 0.3<br>(0.2, 0.3) | 0.2<br>(0.2, 0.3) | 0.2<br>(0.2, 0.3) | 0.3<br>(0.2, 0.3) | 0.1<br>(0.1, 0.1) | 0.2<br>(0.1, 0.2) | 0.4<br>(0.3, 0.5) | 0.2<br>(0.2, 0.3) | 0.2<br>(0.2, 0.3) |
| Salty snacks                               | 0.0<br>(0.0, 0.0) | 0.1<br>(0.1, 0.1) | 0.4<br>(0.3, 0.4) | 0.2<br>(0.1, 0.2) | 0.2<br>(0.2, 0.3) | 0.1<br>(0.1, 0.2) | 0.2<br>(0.1, 0.2) | 0.1<br>(0.1, 0.2) | 0.2<br>(0.2, 0.3) | 0.2<br>(0.1, 0.2) | 0.2<br>(0.1, 0.2) |
| Total fat intake (g) <sup>^</sup>          | 2.1 (1.6, 2.7)    | 2.7 (2.0, 3.4)    | 5.5 (4.5, 6.5)    | 3.8 (2.9, 4.6)    | 3.1 (2.4, 3.8)    | 3.5 (2.7, 4.2)    | 1.4 (1.0, 1.8)    | 3.7 (2.9, 4.5)    | 5.3 (4.4, 6.2)    | 3.8 (3.2, 4.4)    | 2.7 (2.1, 3.3)    |
| Regular fat intake (g) <sup>&amp;</sup>    | 2.0 (1.5, 2.6)    | 2.4 (1.8, 3.0)    | 5.0 (4.1, 5.9)    | 3.2 (2.4, 3.9)    | 2.9 (2.3, 3.6)    | 3.4 (2.6, 4.1)    | 1.4 (1.0, 1.8)    | 3.4 (2.6, 4.2)    | 4.7 (3.9, 5.5)    | 3.4 (2.8, 3.9)    | 2.6 (2.0, 3.2)    |
| Percentage energy from dietary fat         | 34.0 (33.2, 34.8) | 34.3 (33.5, 35.1) | 37.9 (36.8, 39.0) | 36.0 (35.1, 36.9) | 35.0 (34.2, 35.9) | 35.2 (34.1, 36.2) | 33.2 (32.4, 33.9) | 35.2 (34.3, 36.0) | 37.9 (36.7, 39.0) | 35.9 (35.2, 36.6) | 34.3 (33.4, 35.3) |

Polish-aMED® – ‘Polish-adapted Mediterranean Diet’ score (range of points: 0-8), levels (in points): ‘lower’ (0-4), ‘higher’ (5-8); the frequency consumption was expressed as a times/day after assigning the values for categories of frequency consumption as follows: ‘never or almost never’=0; ‘once a month or less’=0.025; ‘several times a month’=0.1; ‘several times a week’=0.571; ‘daily’=1; ‘several times a day’=2; <sup>^</sup>means as intake of total fat added to food; <sup>&</sup>means as intake of regular fat added to food, after the reduced-fat margarine used was including; the procedure of the total fat intake, regular fat intake and percentage energy from dietary fat calculation are given in the Materials and Methods section; 95%CI – 95% confidence interval.

**Table S4.** The sample characteristics by dietary patterns among Polish health care workers (%) or mean (SD).

| Variable                  | Dietary Patterns (tertiles/levels) |           |           |         |                        |           |           |         |                           |           |           |         |              |          |         |
|---------------------------|------------------------------------|-----------|-----------|---------|------------------------|-----------|-----------|---------|---------------------------|-----------|-----------|---------|--------------|----------|---------|
|                           | 'Sweet-salty-snack-dairy'          |           |           |         | 'Lacto-ovo-vegetarian' |           |           |         | 'Meat- fats-alcohol-fish' |           |           |         | Polish-aMED® |          |         |
|                           | bottom                             | middle    | upper     | p-Value | bottom                 | middle    | upper     | p-Value | bottom                    | middle    | upper     | p-Value | lower        | higher   | p-Value |
| Sample size (n)           | 148                                | 148       | 149       |         | 148                    | 149       | 148       |         | 149                       | 147       | 149       |         | 297          | 148      |         |
| Gender                    |                                    |           |           |         |                        |           |           |         |                           |           |           |         |              |          |         |
| men                       | 15.5                               | 20.3      | 24.2      | 0.1774  | 21.6                   | 22.1      | 16.2      | 0.3684  | 17.4                      | 15.6      | 26.8      | 0.0349  | 20.9         | 18.2     | 0.5131  |
| women                     | 84.5                               | 79.7      | 75.8      |         | 78.4                   | 77.9      | 83.8      |         | 82.6                      | 84.4      | 73.2      |         | 79.1         | 81.8     |         |
| Age (years <sup>*</sup> ) | 39.6±11.1                          | 34.0±10.1 | 32.4±10.2 | <0.0001 | 36.1±12.1              | 34.7±10.4 | 35.3±10.1 | 0.7409  | 33.5±9.9                  | 36.5±11.1 | 36.1±11.5 | 0.0468  | 35.6±11.4    | 34.8±9.8 | 0.9685  |
| <30.0                     | 23.6                               | 47.3      | 54.4      |         | 43.2                   | 45.0      | 37.2      |         | 47.0                      | 38.8      | 39.6      |         | 43.1         | 39.2     |         |
| 30.0-39.9                 | 29.1                               | 27.0      | 26.2      | <0.0001 | 21.6                   | 26.8      | 33.8      | 0.2761  | 28.9                      | 25.9      | 27.5      | 0.2812  | 24.6         | 33.1     | 0.2024  |
| 40.0-49.9                 | 27.0                               | 15.5      | 10.1      |         | 18.2                   | 16.8      | 17.6      |         | 14.1                      | 22.4      | 16.1      |         | 17.5         | 17.6     |         |
| ≥50.0                     | 20.3                               | 10.1      | 9.4       |         | 16.9                   | 11.4      | 11.5      |         | 10.1                      | 12.9      | 16.8      |         | 14.8         | 10.1     |         |
| SES Index <sup>#</sup>    | 11.2±1.6                           | 11.6±1.4  | 11.5±1.3  | 0.2469  | 11.2±1.6               | 11.5±1.4  | 11.6±1.3  | 0.1655  | 11.7±1.2                  | 11.3±1.6  | 11.2±1.5  | 0.0186  | 11.3±1.4     | 11.6±1.5 | 0.0243  |

|                                              |           |           |           |             |               |               |               |        |           |           |           |        |           |           |         |
|----------------------------------------------|-----------|-----------|-----------|-------------|---------------|---------------|---------------|--------|-----------|-----------|-----------|--------|-----------|-----------|---------|
| low                                          | 1.4       | 0.0       | 0.0       |             | 1.4           | 0.0           | 0.0           |        | 0.0       | 0.7       | 0.7       |        | 0.3       | 0.7       |         |
| average                                      | 30.8      | 24.5      | 24.3      | 0.1733      | 34.0          | 23.8          | 21.8          | 0.0273 | 18.4      | 31.0      | 30.2      | 0.0661 | 30.5      | 18.5      | 0.0248  |
| high                                         | 67.8      | 75.5      | 75.7      |             | 64.6          | 76.2          | 78.2          |        | 81.6      | 68.3      | 69.1      |        | 69.2      | 80.8      |         |
| BMI (kg/m <sup>2</sup> *)                    | 24.2±3.3  | 24.2±2.9  | 24.3±2.8  | 0.7958      | 24.2±3.0      | 24.1±2.9      | 24.4±3.2      | 0.7983 | 24.0±2.9  | 24.1±2.9  | 24.5±3.2  | 0.3556 | 24.2±3.0  | 24.3±3.0  | 0.8931  |
| underweight (<18.5)                          | 3.4       | 0.7       | 0.0       |             | 1.4           | 0.7           | 2.0           |        | 1.3       | 0.7       | 2.0       |        | 1.3       | 1.4       |         |
| normal weight (18.5-24.9)                    | 53.7      | 56.8      | 54.4      | 0.1787      | 55.1          | 56.4          | 53.4          | 0.3598 | 55.7      | 60.5      | 48.6      | 0.3994 | 54.2      | 56.5      | 0.8776  |
| overweight (25.0-29.9)                       | 38.1      | 39.9      | 43.0      |             | 39.5          | 42.3          | 39.2          |        | 40.9      | 34.7      | 45.3      |        | 41.4      | 38.1      |         |
| obesity (≥30)                                | 4.8       | 2.7       | 2.7       |             | 4.1           | 0.7           | 5.4           |        | 2.0       | 4.1       | 4.1       |        | 3.0       | 4.1       |         |
| Chronic diseases                             | 47.2      | 44.9      | 22.8      | <0.000<br>1 | 36.1          | 40.1          | 38.4          | 0.7704 | 32.4      | 45.1      | 37.2      | 0.0784 | 36.4      | 41.8      | 0.2735  |
| Taking medication > 1 year                   | 39.2      | 37.8      | 17.4      | <0.000<br>1 | 33.8          | 30.9          | 29.7          | 0.7408 | 27.5      | 33.3      | 33.6      | 0.4454 | 30.3      | 33.8      | 0.4563  |
| Physical activity <sup>1</sup>               |           |           |           |             |               |               |               |        |           |           |           |        |           |           |         |
| GLTEQ (summary points*)                      | 37.7±26.9 | 38.5±29.1 | 33.2±29.0 | 0.1614      | 33.5±32.<br>3 | 33.9±23.<br>8 | 41.7±27.<br>7 | 0.0155 | 39.8±30.6 | 36.0±28.0 | 33.5±26.7 | 0.3710 | 34.4±27.5 | 41.1±30.3 | 0.0723  |
| GLTEQ (strenuous and moderate points*)       | 28.7±23.7 | 29.1±23.9 | 25.7±25.6 | 0.2214      | 26.1±26.<br>6 | 24.3±19.<br>9 | 32.7±25.<br>4 | 0.0204 | 30.8±26.1 | 27.2±23.9 | 25.5±23.1 | 0.2961 | 26.6±23.9 | 30.6±25.6 | 0.1961  |
| insufficiently active                        | 24.7      | 26.9      | 38.3      |             | 38.5          | 28.4          | 23.8          |        | 25.3      | 31.9      | 33.6      |        | 30.8      | 29.2      |         |
| moderately active                            | 22.5      | 19.2      | 19.6      | 0.2263      | 17.3          | 26.3          | 17.8          | 0.0656 | 21.2      | 17.6      | 21.8      | 0.6097 | 22.7      | 14.6      | 0.1925  |
| active                                       | 52.8      | 53.8      | 42.1      |             | 44.2          | 45.3          | 58.4          |        | 53.5      | 50.5      | 44.5      |        | 46.4      | 56.2      |         |
| Alcohol drinking                             |           |           |           |             |               |               |               |        |           |           |           |        |           |           |         |
| within the 12 last months                    | 35.4      | 30.4      | 40.3      | 0.2060      | 34.5          | 38.3          | 33.3          | 0.6495 | 33.1      | 27.2      | 45.6      | 0.0032 | 36.4      | 33.3      | 0.5297  |
| within the last 10 years                     | 76.2      | 68.7      | 80.5      | 0.0587      | 77.6          | 74.5          | 73.5          | 0.7010 | 75.5      | 71.4      | 78.5      | 0.3662 | 74.0      | 77.6      | 0.4135  |
| Smoking status (smoker <sup>2</sup> )        | 54.1      | 50.0      | 60.1      | 0.2113      | 55.4          | 57.0          | 51.7          | 0.6394 | 51.7      | 52.1      | 60.4      | 0.2326 | 53.9      | 56.5      | 0.6058  |
| Current smoker                               | 14.9      | 12.3      | 22.1      | 0.0612      | 23.8          | 16.1          | 9.5           | 0.0043 | 13.6      | 15.0      | 20.8      | 0.2067 | 18.9      | 11.6      | 0.0495  |
| Vitamin/mineral supplements use <sup>3</sup> | 68.9      | 73.0      | 70.5      | 0.7412      | 63.5          | 74.5          | 74.3          | 0.0586 | 71.1      | 76.2      | 65.1      | 0.1100 | 68.4      | 75.7      | 0.1094  |
| Number of meals                              |           |           |           |             |               |               |               |        |           |           |           |        |           |           |         |
| 1-2                                          | 6.1       | 7.4       | 11.4      |             | 10.8          | 8.7           | 5.4           |        | 9.4       | 6.1       | 9.4       |        | 9.8       | 5.4       |         |
| 3                                            | 27.0      | 25.7      | 30.9      | 0.5118      | 34.5          | 27.5          | 21.6          | 0.0917 | 21.5      | 32.7      | 29.5      | 0.3839 | 33.0      | 17.6      | 0.0006  |
| 4                                            | 48.0      | 45.9      | 38.9      |             | 37.8          | 44.3          | 50.7          |        | 47.7      | 44.2      | 40.9      |        | 40.7      | 51.4      |         |
| ≥5                                           | 18.9      | 20.9      | 18.8      |             | 16.9          | 19.5          | 22.3          |        | 21.5      | 17.0      | 20.1      |        | 16.5      | 25.7      |         |
| Special diet or intake restrictions          | 55.4      | 44.6      | 22.3      | <0.000<br>1 | 29.1          | 42.6          | 50.7          | 0.0007 | 49.3      | 45.6      | 27.5      | 0.0002 | 34.1      | 54.1      | <0.0001 |
| Overall decrease in food consumption         | 84.5      | 78.4      | 61.1      | <0.000<br>1 | 70.9          | 73.2          | 79.7          | 0.1956 | 83.9      | 71.4      | 68.5      | 0.0051 | 73.4      | 77.0      | 0.4077  |

| Restriction in consumption of: |      |      |      |             |      |      |      |             |      |      |      |         |      |      |         |
|--------------------------------|------|------|------|-------------|------|------|------|-------------|------|------|------|---------|------|------|---------|
| dairy                          | 49.0 | 25.7 | 12.8 | <0.000<br>1 | 24.3 | 32.9 | 29.9 | 0.2563      | 26.8 | 36.1 | 24.3 | 0.0654  | 24.7 | 37.8 | 0.0039  |
| fish                           | 19.0 | 19.0 | 12.8 | 0.2482      | 19.7 | 17.4 | 13.6 | 0.3675      | 25.5 | 15.6 | 9.5  | 0.0011  | 18.3 | 14.2 | 0.2759  |
| fruits                         | 13.5 | 8.8  | 6.7  | 0.1284      | 12.2 | 8.1  | 8.8  | 0.4470      | 6.0  | 11.6 | 11.5 | 0.1822  | 9.4  | 10.2 | 0.7946  |
| raw vegetables                 | 5.4  | 6.1  | 4.0  | 0.7158      | 8.8  | 3.4  | 3.4  | 0.0531      | 8.1  | 4.1  | 3.4  | 0.1463  | 5.7  | 4.1  | 0.4625  |
| fats                           | 61.2 | 56.8 | 44.6 | 0.0122      | 39.9 | 59.1 | 63.7 | <0.000<br>1 | 65.8 | 55.5 | 41.2 | 0.0001  | 50.2 | 62.3 | 0.0158  |
| foods in high fat content      | 77.0 | 69.6 | 46.3 | <0.000<br>1 | 53.4 | 66.4 | 73.0 | 0.0016      | 72.5 | 70.7 | 49.7 | <0.0001 | 58.2 | 76.4 | 0.0002  |
| sugar and sweets               | 85.8 | 74.1 | 52.0 | <0.000<br>1 | 58.1 | 73.2 | 80.8 | <0.000<br>1 | 81.1 | 74.0 | 57.0 | <0.0001 | 68.7 | 74.7 | 0.1945  |
| potatoes and cereals           | 41.2 | 28.4 | 20.1 | 0.0003      | 23.6 | 28.2 | 37.8 | 0.0245      | 34.9 | 29.3 | 25.5 | 0.2038  | 27.3 | 35.1 | 0.0878  |
| meat and meat products         | 51.4 | 45.9 | 31.5 | 0.0017      | 29.1 | 43.0 | 56.8 | <0.000<br>1 | 61.7 | 44.2 | 22.8 | <0.0001 | 34.7 | 59.5 | <0.0001 |

SES—socioeconomic status calculated on the basis of place of residence, education level, and self-declared situation of household (description in the Materials and Methods section); BMI—body mass index; <sup>1</sup>data for n=296; <sup>2</sup>ever-smoker (current and/or former smoker); <sup>3</sup>self-declared use of vitamin and/or mineral supplements within the last 12 months; %—sample percentage; #mean and standard deviation (SD); *p*-value—level of significance verified with chi<sup>2</sup> test (categorical variables) or Kruskal-Wallis' test (continuous variables); *p* < 0.05—statistically significant.

**Table S5.** The mean (SD) of the food consumption by mode of the work among Polish health care workers.

| Variables                                             | Total sample | Mode of the work |           | <i>p</i> -Value |
|-------------------------------------------------------|--------------|------------------|-----------|-----------------|
|                                                       |              | shift            | daily     |                 |
| Size (n)                                              | 445          | 193              | 252       |                 |
| Frequency of food consumption (times/day)*            |              |                  |           |                 |
| Sugar, honey and sweets                               | 1.3 ±1.4     | 1.4±1.4          | 1.2±1.4   | 0.0088          |
| Milk and milk beverages – natural and cheese curds    | 1.0 ±0.8     | 1.0±0.8          | 1.0±0.9   | 0.9711          |
| Milk beverages – sweetened and flavoured cheese curds | 0.3 ±0.5     | 0.3±0.5          | 0.2±0.5   | 0.0004          |
| Cheese                                                | 0.4 ±0.5     | 0.4±0.5          | 0.4±0.5   | 0.7917          |
| Eggs and egg dishes                                   | 0.5 ±0.5     | 0.5±0.5          | 0.5±0.4   | 0.8388          |
| Whole grains                                          | 0.9 ±0.8     | 0.8±0.8          | 0.9±0.8   | 0.2013          |
| Refined grains                                        | 0.6 ±0.6     | 0.7±0.7          | 0.6±0.6   | 0.1298          |
| Breakfast cereals                                     | 0.2 ±0.3     | 0.2 ±0.3         | 0.2 ±0.3  | 0.1372          |
| Vegetable based oil                                   | 0.4 ±0.4     | 0.4±0.3          | 0.5±0.4   | 0.1757          |
| Animal fats                                           | 0.7 ±0.7     | 0.8±0.8          | 0.6±0.7   | 0.0036          |
| Other fats                                            | 0.3 ±0.4     | 0.4±0.5          | 0.2±0.4   | 0.0006          |
| Fruits                                                | 0.8 ±0.6     | 0.8±0.6          | 0.7±0.5   | 0.9819          |
| Vegetables                                            | 0.9 ±0.6     | 0.8±0.6          | 1.0±0.7   | 0.0176          |
| Legumes                                               | 0.5 ±0.6     | 0.5±0.7          | 0.5±0.6   | 0.6437          |
| Potatoes                                              | 0.4 ±0.4     | 0.4±0.4          | 0.3±0.4   | 0.0045          |
| Nuts and seeds                                        | 0.7 ±0.8     | 0.7±0.8          | 0.7±0.9   | 0.1491          |
| Processed meats                                       | 0.6 ±0.7     | 0.8±0.8          | 0.5±0.6   | 0.0001          |
| White meat                                            | 0.3 ±0.4     | 0.4±0.4          | 0.3±0.3   | 0.0001          |
| Fish                                                  | 0.4 ±0.5     | 0.4±0.6          | 0.3±0.4   | 0.1592          |
| Fruit, vegetable or vegetable-fruit juices            | 0.3 ±0.5     | 0.3±0.5          | 0.3±0.5   | 0.1389          |
| Sweetened beverages                                   | 0.1 ±0.3     | 0.1±0.3          | 0.1±0.3   | 0.0001          |
| Alcoholic drinks                                      | 0.2 ±0.4     | 0.2 ±0.4         | 0.2 ±0.4  | 0.7279          |
| Salty snacks                                          | 0.2 ±0.3     | 0.2 ±0.3         | 0.2 ±0.3  | 0.0051          |
| Food consumption (g) <sup>§</sup>                     |              |                  |           |                 |
| Cold cereal                                           | 9.7±14.0     | 9.1±13.7         | 10.2±14.2 | 0.7129          |
| Skim milk, on cereal or to drink                      | 27.8±69.6    | 27.6±69.5        | 27.9±69.8 | 0.0191          |
| Orange juice or grapefruit juice                      | 42.4±83.7    | 46.0±89.4        | 39.6±79.0 | 0.0143          |
| Fruit (not juices)                                    | 74.9±66.6    | 73.4±68.7        | 76.0±65.0 | 0.3254          |
| Eggs, fried or scrambled in margarine, butter or oil  | 22.7±24.2    | 21.5±21.7        | 23.5±26.0 | 0.9682          |
| Sausage or bacon, regular-fat                         | 3.3±5.5      | 3.8±6.1          | 2.9±4.9   | 0.0005          |
| Beef or pork hot dogs, regular fat                    | 2.7±8.1      | 3.7±10.4         | 1.9±5.8   | 0.0004          |
| Cheese or cheese spread, regular-fat                  | 7.1±9.3      | 7.2±8.9          | 7.0±9.5   | 0.0859          |
| French fries, home fries, or hash brown potatoes      | 6.8±12.5     | 7.7±12.5         | 6.1±12.4  | 0.0001          |
| Rice                                                  | 40.0±46.8    | 40.9±46.4        | 39.4±47.1 | 0.3699          |
| Mayonnaise, regular-fat                               | 13.8±10.3    | 15.7±10.4        | 12.4±9.9  | 0.0001          |
| Salad dressings, regular-fat                          | 2.1±4.5      | 2.5±4.8          | 1.8±4.2   | 0.0011          |
| Margarine or butter on bread, rolls, pancakes         | 2.5±3.6      | 2.8±3.9          | 2.3±3.3   | 0.0781          |
| Margarine or butter on vegetables, including potatoes | 0.6±1.3      | 0.7±1.5          | 0.4±1.1   | 0.0072          |
| Margarine, butter, or oil on rice or pasta            | 0.4±1.0      | 0.5±1.3          | 0.2±0.8   | 0.0012          |

\*data from the 62-item FFQ-6®, the frequency consumption was expressed as a times/day after assigning the values for categories of frequency consumption as follows: ‘never or almost never’=0; ‘once a month or less’=0.025; ‘several times a month’=0.1; ‘several times a week’=0.571; ‘daily’=1; ‘several times a day’=2; <sup>§</sup>data from the Quick Food Scan of the National Cancer Institute; *p* < 0.05 – statistically significant.

**Table S6.** Fat intake, food consumption, and dietary patterns in association with the percentage of energy from dietary fat among Polish health care workers (% or mean (SD)).

| Variable                                                                                 | Percentage energy from dietary fat |           | p-Value |
|------------------------------------------------------------------------------------------|------------------------------------|-----------|---------|
|                                                                                          | 20-35%                             | >35%      |         |
| Sample Size                                                                              | 257                                | 188       |         |
| Total fat intake (g) <sup>^</sup>                                                        | 1.5±2.6                            | 6.0±5.8   | <0.0001 |
| Regular fat intake (g) <sup>^</sup> &                                                    | 1.4±2.3                            | 5.5±5.5   | <0.0001 |
| % energy from dietary fat <sup>‡</sup>                                                   | 31.7±2.1                           | 40.4±5.7  | <0.0001 |
| Food consumption (g) <sup>§</sup>                                                        |                                    |           |         |
| Cold cereal                                                                              | 12.3±15.3                          | 6.1±11.0  | 0.0091  |
| Skim milk, on cereal or to drink                                                         | 37.6±85.0                          | 14.2±35.9 | 0.8714  |
| Orange juice or grapefruit juice                                                         | 38.0±89.1                          | 48.4±75.3 | <0.0001 |
| Fruit (not juices)                                                                       | 79.5±72.5                          | 68.7±57.0 | 0.5565  |
| Eggs, fried or scrambled in margarine, butter or oil                                     | 16.4±20.2                          | 31.2±26.5 | <0.0001 |
| Sausage or bacon, regular-fat                                                            | 1.3±2.3                            | 6.0±7.2   | <0.0001 |
| Beef or pork hot dogs, regular fat                                                       | 0.7±1.3                            | 5.4±11.9  | <0.0001 |
| Cheese or cheese spread, regular-fat                                                     | 5.2±8.2                            | 9.7±10.0  | <0.0001 |
| French fries, home fries, or hash brown potatoes                                         | 3.7±8.4                            | 11.1±15.5 | <0.0001 |
| Rice                                                                                     | 30.3±42.4                          | 53.3±49.2 | <0.0001 |
| Mayonnaise, regular-fat                                                                  | 8.2±4.2                            | 21.5±11.1 | <0.0001 |
| Salad dressings, regular-fat                                                             | 0.7±1.3                            | 4.0±6.3   | <0.0001 |
| Margarine or butter on bread, rolls, pancakes                                            | 1.2±2.2                            | 4.3±4.3   | <0.0001 |
| Margarine or butter on vegetables, including potatoes                                    | 0.2±0.6                            | 1.1±1.8   | <0.0001 |
| Margarine, butter, or oil on rice or pasta                                               | 0.1±0.4                            | 0.7±1.5   | <0.0001 |
| Frequency of reduced-fat margarine use                                                   |                                    |           |         |
| didn't use/almost never                                                                  | 93.3                               | 83.3      | 0.0019  |
| about 1/4 of the time                                                                    | 5.1                                | 13.4      |         |
| about 1/2 of the time                                                                    | 0.0                                | 0.0       |         |
| about 3/4 of the time                                                                    | 0.8                                | 0.0       |         |
| almost always or always                                                                  | 0.8                                | 3.2       |         |
| Fat content in the diet (self-declared)                                                  |                                    |           |         |
| low                                                                                      | 18.9                               | 8.7       | 0.0002  |
| medium                                                                                   | 68.9                               | 66.8      |         |
| high                                                                                     | 12.2                               | 24.5      |         |
| Consistent assessment of comparison of fat content in the diet (objective vs subjective) | 21.3                               | 24.5      | 0.4298  |
| Dietary Patterns (tertiles/levels)                                                       |                                    |           |         |
| 'Sweet-salty-snack-dairy'                                                                |                                    |           |         |
| bottom                                                                                   | 40.5                               | 23.4      | <0.0001 |
| middle                                                                                   | 37.7                               | 27.1      |         |
| upper                                                                                    | 21.8                               | 49.5      |         |
| 'Lacto-ovo-vegetarian'                                                                   |                                    |           |         |
| bottom                                                                                   | 31.5                               | 35.6      | 0.6302  |
| middle                                                                                   | 33.9                               | 33.0      |         |
| upper                                                                                    | 34.6                               | 31.4      |         |
| 'Meat- fats-alcohol-fish'                                                                |                                    |           |         |
| bottom                                                                                   | 44.4                               | 18.6      | <0.0001 |
| middle                                                                                   | 33.1                               | 33.0      |         |
| upper                                                                                    | 22.6                               | 48.4      |         |
| Polish-aMED® score (points) <sup>‡</sup>                                                 | 4.1±1.7                            | 3.6±1.7   | 0.0129  |
| lower (0-4 points)                                                                       | 63.0                               | 71.8      | 0.0523  |
| higher (5-8 points)                                                                      | 37.0                               | 28.2      |         |

Polish-aMED® – Polish-adapted Mediterranean Diet (range of points: 0-8); <sup>^</sup>means as intake of total fat added to food; <sup>^</sup>means as intake of regular fat added to food, after the reduced-fat margarine used was including; the procedure of the total fat intake, regular fat intake and percentage energy from dietary fat calculation are given in the Materials and Methods section; <sup>§</sup>data from the Quick Food Scan of the National Cancer Institute; % – sample percentage; <sup>‡</sup>mean (SD); p-value – level of significance assessed by chi<sup>2</sup> test (categorical variables) or Kruskal-Wallis' test (continuous variables); p < 0.05 – statistically significant.
